# Supplementary material for: Fractalkine Regulates HEC-1A/JEG-3 Interaction by Influencing the Expression of Implantation-Related Genes in an In Vitro Co-Culture Model
Source: MDPI journal article supplement (doi:10.3390/ijms21093175), 2020-04-30
Supplement: s1 [file s1]

## Supplementary materials

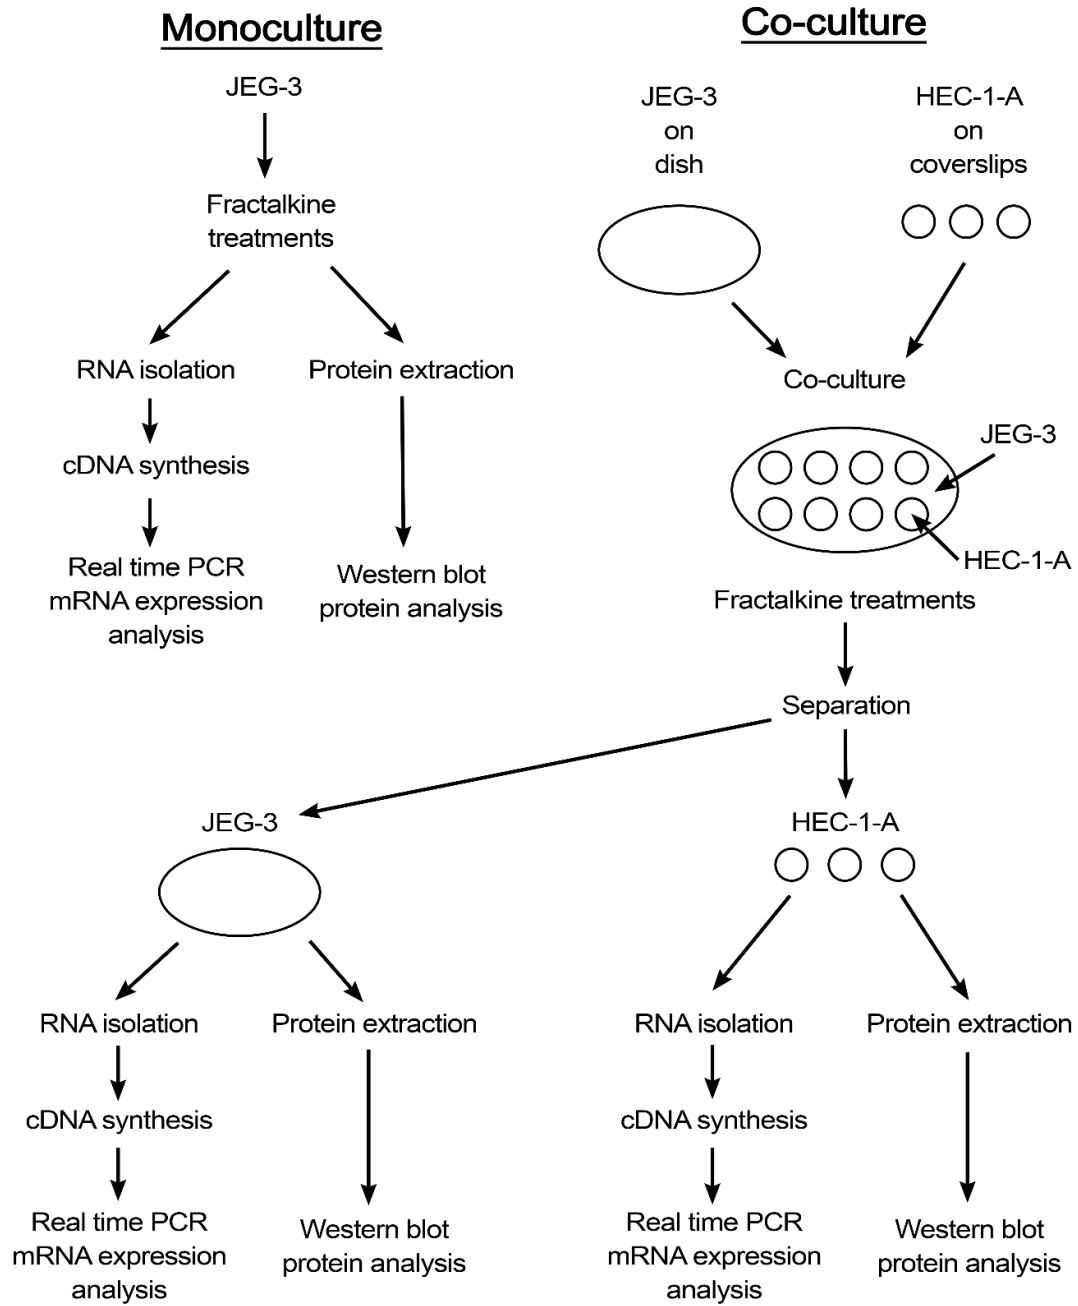

Figure S1. Workflow the experiments.
